# Supplementary material
Source: PubMed Central journal article supplement (PMC3271592)
Supplement: cr2011145x2.pdf [file cr2011145x2.pdf]

## Supplementary information, Figure S2

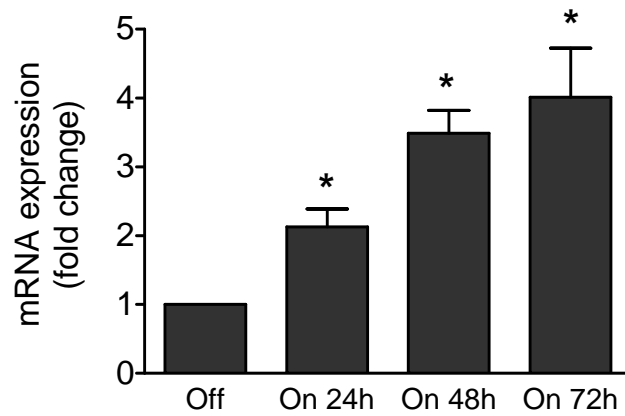

**Figure S2** Effect of K-ras<sup>G12V</sup> induction on the expression of SOD2 mRNA in HEK293 cells. K-ras expression was induced by doxycycline in T-Rex/K-ras cells for 24-72 h as indicated, and SOD2 mRNA levels were measured by quantitative RT-PCR.
